# Supplementary material for: Brucella ceti Infection in Striped Dolphins from Italian Seas: Associated Lesions and Epidemiological Data
Source: MDPI journal article supplement (doi:10.3390/pathogens12081034), 2023-08-13
Supplement: s1 [file s1]

Table S2. Cases organized for the multivariate logistic regression model to evaluate associations between *B. ceti* ST and stranding area, age class, *B. ceti*-associated organ inflammation (histopathological and/or gross findings) and Morbillivirus infectious status.

| Case ID | sex | ST   |      | Stranding area |   |    |      |      |    |   | Age class |       | <i>B. ceti</i> -associated organ inflammation |        |      |        |       |       |      |               | CeMV + |
|---------|-----|------|------|----------------|---|----|------|------|----|---|-----------|-------|-----------------------------------------------|--------|------|--------|-------|-------|------|---------------|--------|
|         |     | 26   | 49   | I              | L | CA | SA   | CT   | ST | S | juvenile  | adult | Brain (CNS)                                   | Repro. | LN   | Spleen | Liver | Heart | Lung | Mammary gland |        |
| 1       | M   | +    | -    | +              | - | -  | -    | -    | -  | - | +         | -     | +                                             | NA     | NA   | NA     | NA    | NA    | NA   | na            | -      |
| 2       | F   | +    | -    | +              | - | -  | -    | -    | -  | - | +         | -     | +                                             | NA     | -    | -      | -     | NA    | NA   | NA            | -      |
| 3       | M   | +    | -    | -              | + | -  | -    | -    | -  | - | -         | +     | +                                             | -      | -    | NA     | -     | -     | +    | na            | -      |
| 4       | nd  | +    | -    | -              | - | -  | +    | -    | -  | - | nd        | nd    | NA                                            | NA     | NA   | NA     | NA    | NA    | NA   | NA            | -      |
| 5       | M   | +    | -    | +              | - | -  | -    | -    | -  | - | +         | -     | +                                             | NA     | NA   | NA     | NA    | NA    | NA   | na            | -      |
| 6       | M   | +    | -    | -              | + | -  | -    | -    | -  | - | +         | -     | +                                             | NA     | +    | +      | +     | NA    | +    | na            | +      |
| 7       | F   | +    | -    | +              | - | -  | -    | -    | -  | - | -         | +     | +                                             | NA     | NA   | NA     | NA    | NA    | NA   | NA            | +      |
| 8       | M   | +    | -    | +              | - | -  | -    | -    | -  | - | +         | -     | +                                             | NA     | NA   | -      | -     | -     | -    | na            | +      |
| 9       | M   | +    | -    | +              | - | -  | -    | -    | -  | - | +         | -     | +                                             | NA     | NA   | NA     | NA    | NA    | -    | na            | +      |
| 10      | F   | +    | -    | -              | - | +  | -    | -    | -  | - | -         | +     | +                                             | +      | +    | +      | NA    | NA    | +    | +             | +      |
| 11      | F   | +    | -    | -              | - | -  | -    | +    | -  | - | +         | -     | -                                             | NA     | NA   | -      | -     | -     | -    | NA            | +      |
| 12      | M   | -    | +    | -              | - | -  | -    | -    | +  | - | -         | +     | -                                             | +      | -    | NA     | NA    | NA    | -    | na            | +      |
| 13      | F   | +    | -    | -              | - | -  | -    | -    | -  | + | -         | +     | -                                             | NA     | NA   | NA     | NA    | NA    | -    | NA            | +      |
| 14      | F   | +    | -    | -              | - | +  | -    | -    | -  | - | -         | +     | +                                             | -      | -    | -      | NA    | -     | -    | NA            | -      |
| 15      | F   | +    | -    | -              | - | +  | -    | -    | -  | - | +         | -     | +                                             | -      | -    | -      | -     | NA    | -    | NA            | -      |
| 16      | F   | +    | -    | -              | - | +  | -    | -    | -  | - | -         | +     | +                                             | +      | -    | +      | -     | NA    | -    | NA            | -      |
| 17      | F   | +    | -    | -              | - | -  | -    | -    | -  | + | -         | +     | +                                             | +      | +    | NA     | -     | NA    | -    | NA            | -      |
| 18      | F   | +    | -    | -              | - | -  | +    | -    | -  | - | -         | +     | +                                             | +      | -    | -      | +     | +     | -    | NA            | -      |
| 19      | F   | +    | -    | -              | - | +  | -    | -    | -  | - | -         | +     | +                                             | NA     | +    | -      | -     | +     | -    | NA            | +      |
| 20      | F   | +    | -    | -              | - | +  | -    | -    | -  | - | -         | +     | +                                             | -      | -    | -      | -     | -     | -    | -             | -      |
| 21      | M   | -    | +    | -              | - | -  | -    | +    | -  | - | -         | +     | +                                             | -      | NA   | +      | -     | -     | -    | na            | +      |
| 22      | F   | -    | +    | -              | - | -  | -    | +    | -  | - | -         | +     | +                                             | -      | -    | -      | -     | -     | -    | -             | +      |
| 23      | F   | +    | -    | -              | - | -  | +    | -    | -  | - | nd        | nd    | +                                             | NA     | NA   | -      | -     | -     | -    | NA            | -      |
| 24      | F   | +    | -    | -              | - | -  | -    | -    | +  | - | -         | +     | +                                             | -      | -    | NA     | -     | -     | -    | NA            | +      |
| TOT     |     | 21   | 3    | 6              | 2 | 6  | 3    | 3    | 2  | 2 | 9/22      | 13/22 | 20/23                                         | 5/12   | 4/14 | 4/14   | 2/15  | 2/11  | 3/19 | 1/3           | 12/24  |
| %       |     | 87,5 | 12,5 | 25             | 8 | 25 | 12,5 | 12,5 | 8  | 8 | 40.9      | 59,09 | 86,9                                          | 41,6   | 28,5 | 28,5   | 13,3  | 18,1  | 15,7 | 33,3          | 50     |

NA: sample not available for histopathology; na: sample not available (male); not determined; I: Ionian Sea; L: Ligurian Sea; CA: Central Adriatic Sea; SA: Southern Adriatic Sea; CT: Central Tyrrhenian Sea; ST: Southern Tyrrhenian Sea; S: Sardinian Sea
